# Supplementary material for: Mass Spectrometric Screening of Ovarian Cancer with Serum Glycans
Source: Hindawi journal article supplement (doi:10.1155/2014/634289), 2014-01-01
Supplement: f1 [file 634289.f1.pdf]

Supplementary Table 1. Successful classification of recurrent ovarian cancer patients

| Age | Stage    | Cell type                                    | Recurrence | CA125<br>(U/ml) | Screening (P: patient) |                  |                  |
|-----|----------|----------------------------------------------|------------|-----------------|------------------------|------------------|------------------|
|     |          |                                              |            |                 | 90% <sup>a</sup>       | 85% <sup>a</sup> | 80% <sup>a</sup> |
| 50  | Ia       | SCC                                          | Y          |                 | P                      | P                | P                |
| 42  | Ic       | serous cystadenocarcinoma                    | Y          |                 | P                      | P                | P                |
| 54  | IIa, G2  | adenocarcinoma, mixed endometrioid           | Y          | 68.55           | P                      | P                | P                |
| 56  | IIIa, G3 | serous adenocarcinma                         | Y          | 81.3            | P                      | P                | P                |
| 67  | IIIc     | strumal carcinoid                            | Y          |                 | P                      | P                | P                |
| 58  | IIIc, G3 | serous adenocarcinma                         | Y          | 33.51           | P                      | P                | P                |
| 41  | IIIc, G3 | mixed serous and transitional cell carcinoma | Y          | 27.69           | P                      | P                | P                |
| 58  | IV       | MMMT                                         | Y          | 82.49           | P                      | P                | P                |

<sup>a</sup> Sensitivities for the determination of the screening score thresholds in the training set. In the following column, the same score threshold was used for the screening of the test samples.

1

Supplementary Table 2. Classification of ovarian cancer sera depending on the cell types

| <b>Sensitivity standard for thresholds<br/>(Training set)</b> |                        | <b>90%</b>  | <b>85%</b>  | <b>80%</b>  | <b>CA-125</b> |
|---------------------------------------------------------------|------------------------|-------------|-------------|-------------|---------------|
| <b>Sensitivity in the<br/>training set</b>                    | <b>Clear cell type</b> | <b>100%</b> | <b>100%</b> | <b>100%</b> | <b>80%</b>    |
|                                                               | <b>Serous type</b>     | <b>88%</b>  | <b>81%</b>  | <b>69%</b>  | <b>73%</b>    |
| <b>Sensitivity in the<br/>blind test set</b>                  | <b>Clear cell type</b> | <b>89%</b>  | <b>89%</b>  | <b>89%</b>  | <b>67%</b>    |
|                                                               | <b>Serous type</b>     | <b>93%</b>  | <b>93%</b>  | <b>87%</b>  | <b>92%</b>    |

2

3

4

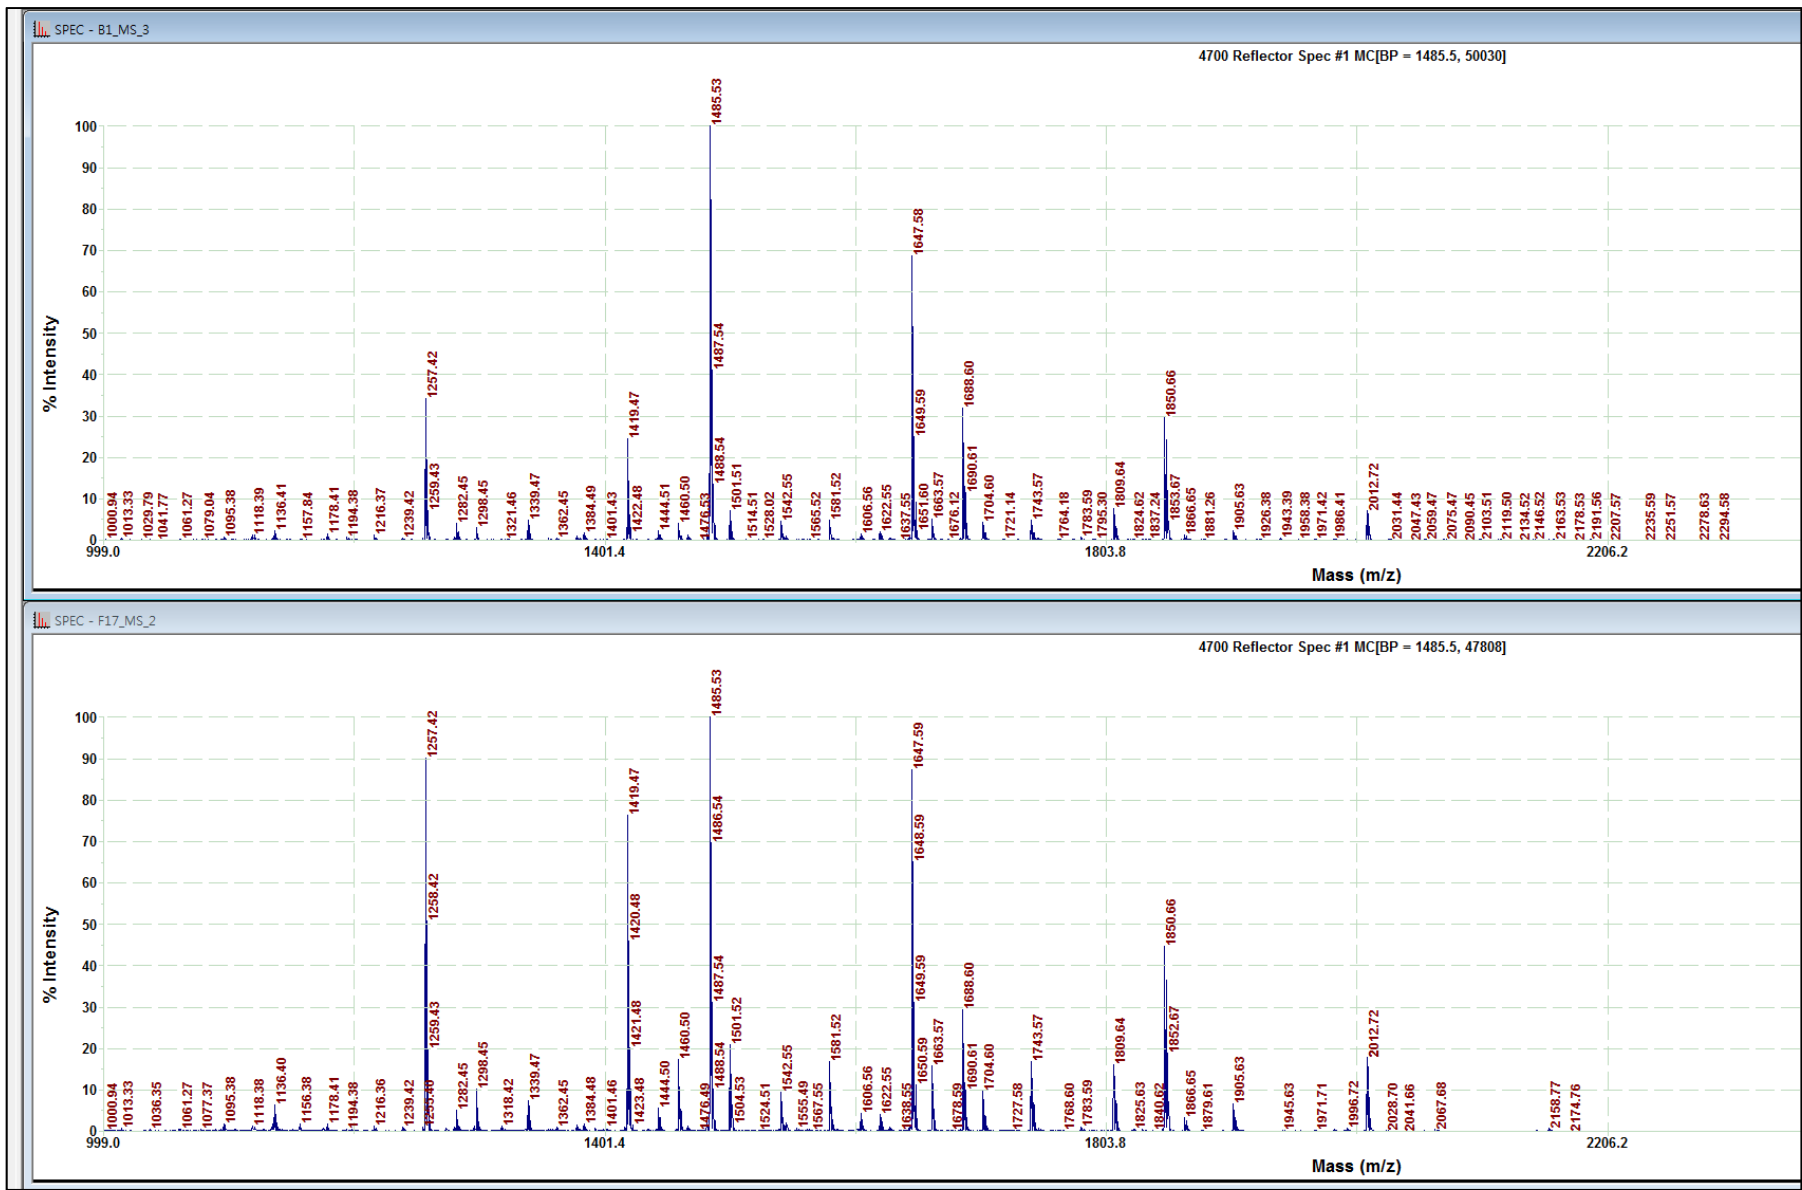

Supplementary Figure 1

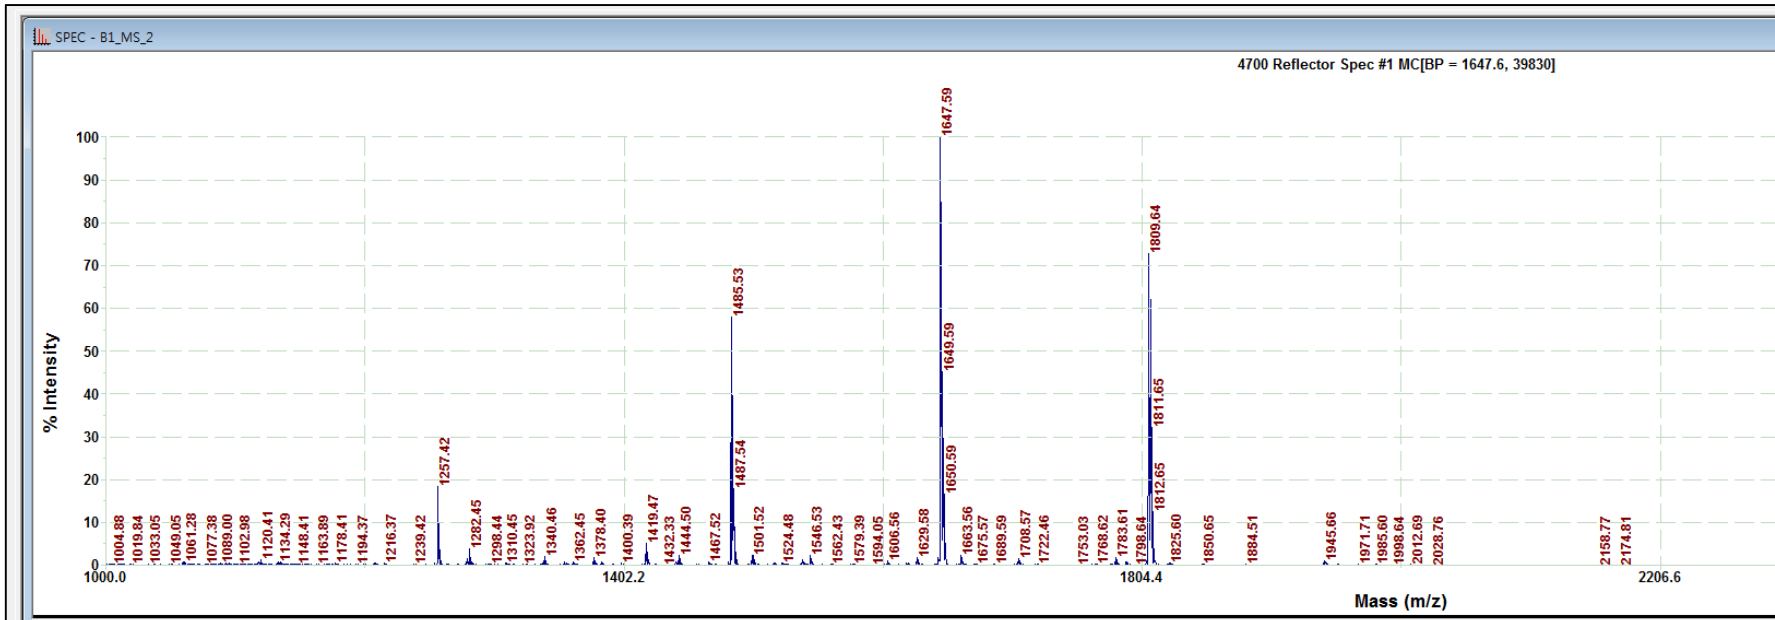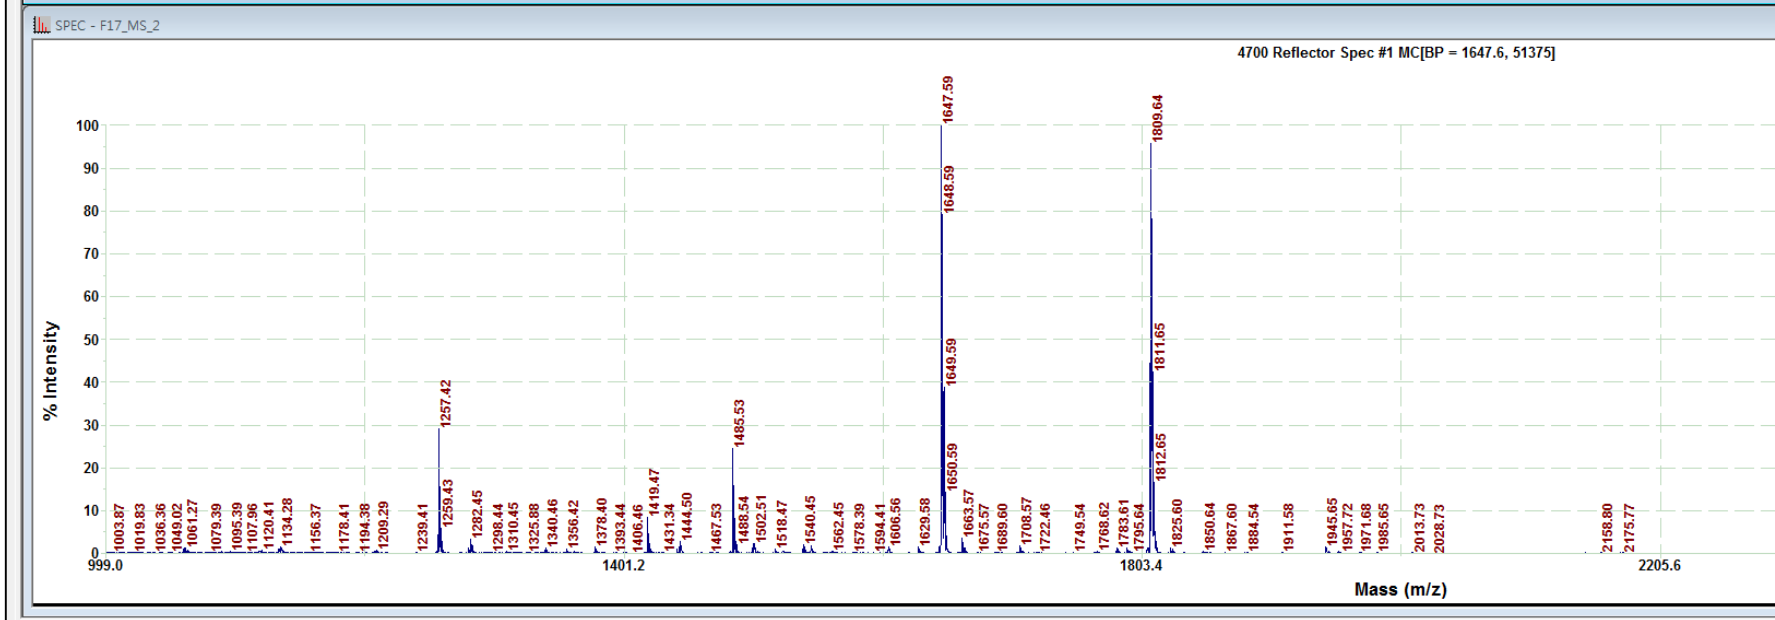

Supplementary Figure 2
